# Supplementary material for: The Timing of Raf/ERK and AKT Activation in Protecting PC12 Cells against Oxidative Stress
Source: PubMed Central journal article supplement (PMC4833326; doi:10.1371/journal.pone.0153487), 2016-04-15
Supplement: pone.0153487.s012.pdf [file pone.0153487.s012.pdf]

## Table S1

### Figure 2C

#### LIGHT

| ANOVA table                 | SS    | DF | MS    | F (DFn, DFd)     | P value    |
|-----------------------------|-------|----|-------|------------------|------------|
| Treatment (between columns) | 2414  | 2  | 1207  | F (2, 6) = 316.0 | P < 0.0001 |
| Residual (within columns)   | 22.92 | 6  | 3.820 |                  |            |
| Total                       | 2437  | 8  |       |                  |            |

#### DARK

| ANOVA table                 | SS    | DF | MS    | F (DFn, DFd)      | P value    |
|-----------------------------|-------|----|-------|-------------------|------------|
| Treatment (between columns) | 7.410 | 2  | 3.705 | F (2, 6) = 0.1894 | P = 0.8322 |
| Residual (within columns)   | 117.4 | 6  | 19.56 |                   |            |
| Total                       | 124.8 | 8  |       |                   |            |

### Figure 2D

#### LIGHT

| ANOVA table                 | SS    | DF | MS    | F (DFn, DFd)     | P value    |
|-----------------------------|-------|----|-------|------------------|------------|
| Treatment (between columns) | 1152  | 2  | 575.9 | F (2, 6) = 24.31 | P = 0.0013 |
| Residual (within columns)   | 142.1 | 6  | 23.69 |                  |            |
| Total                       | 1294  | 8  |       |                  |            |

#### DARK

| ANOVA table                 | SS    | DF | MS    | F (DFn, DFd)      | P value    |
|-----------------------------|-------|----|-------|-------------------|------------|
| Treatment (between columns) | 7.410 | 2  | 3.705 | F (2, 6) = 0.1894 | P = 0.8322 |
| Residual (within columns)   | 117.4 | 6  | 19.56 |                   |            |
| Total                       | 124.8 | 8  |       |                   |            |

Figure 3B

LIGHT

| ANOVA table                 | SS    | DF | MS    | F (DFn, DFd)     | P value    |
|-----------------------------|-------|----|-------|------------------|------------|
| Treatment (between columns) | 3035  | 2  | 1517  | F (2, 9) = 486.3 | P < 0.0001 |
| Residual (within columns)   | 28.08 | 9  | 3.120 |                  |            |
| Total                       | 3063  | 11 |       |                  |            |

DARK

| ANOVA table                 | SS    | DF | MS    | F (DFn, DFd)     | P value    |
|-----------------------------|-------|----|-------|------------------|------------|
| Treatment (between columns) | 66.22 | 2  | 33.11 | F (2, 6) = 8.241 | P = 0.0190 |
| Residual (within columns)   | 24.11 | 6  | 4.018 |                  |            |
| Total                       | 90.33 | 8  |       |                  |            |

Figure 3C

LIGHT

| ANOVA table                 | SS    | DF | MS    | F (DFn, DFd)      | P value    |
|-----------------------------|-------|----|-------|-------------------|------------|
| Treatment (between columns) | 1018  | 2  | 509.1 | F (2, 12) = 39.31 | P < 0.0001 |
| Residual (within columns)   | 155.4 | 12 | 12.95 |                   |            |
| Total                       | 1174  | 14 |       |                   |            |

DARK

| ANOVA table                 | SS     | DF | MS      | F (DFn, DFd)         | P value    |
|-----------------------------|--------|----|---------|----------------------|------------|
| Treatment (between columns) | 0.1053 | 2  | 0.05267 | F (2, 12) = 0.005571 | P = 0.9944 |
| Residual (within columns)   | 113.4  | 12 | 9.454   |                      |            |
| Total                       | 113.5  | 14 |         |                      |            |

Figure 3D

LIGHT

| ANOVA table                 | SS    | DF | MS    | F (DFn, DFd)     | P value    |
|-----------------------------|-------|----|-------|------------------|------------|
| Treatment (between columns) | 3713  | 2  | 1856  | F (2, 6) = 717.7 | P < 0.0001 |
| Residual (within columns)   | 15.52 | 6  | 2.587 |                  |            |
| Total                       | 3728  | 8  |       |                  |            |

DARK

| ANOVA table                 | SS    | DF | MS    | F (DFn, DFd)     | P value    |
|-----------------------------|-------|----|-------|------------------|------------|
| Treatment (between columns) | 3.877 | 2  | 1.938 | F (2, 6) = 1.376 | P = 0.3222 |
| Residual (within columns)   | 8.452 | 6  | 1.409 |                  |            |
| Total                       | 12.33 | 8  |       |                  |            |

Figure 3E

LIGHT

| ANOVA table                 | SS    | DF | MS    | F (DFn, DFd)     | P value    |
|-----------------------------|-------|----|-------|------------------|------------|
| Treatment (between columns) | 3637  | 2  | 1819  | F (2, 6) = 173.4 | P < 0.0001 |
| Residual (within columns)   | 62.95 | 6  | 10.49 |                  |            |
| Total                       | 3700  | 8  |       |                  |            |

DARK

| ANOVA table                 | SS    | DF | MS    | F (DFn, DFd)      | P value    |
|-----------------------------|-------|----|-------|-------------------|------------|
| Treatment (between columns) | 66.84 | 2  | 33.42 | F (2, 6) = 0.6509 | P = 0.5548 |
| Residual (within columns)   | 308.1 | 6  | 51.35 |                   |            |
| Total                       | 374.9 | 8  |       |                   |            |

Figure S4

| ANOVA table                 | SS    | DF | MS    | F (DFn, DFd)     | P value    |
|-----------------------------|-------|----|-------|------------------|------------|
| Treatment (between columns) | 765.6 | 2  | 382.8 | F (2, 6) = 303.2 | P < 0.0001 |
| Residual (within columns)   | 7.575 | 6  | 1.263 |                  |            |
| Total                       | 773.1 | 8  |       |                  |            |

**Legend:**

SS: Sum of squares

DF: Degree of freedom

MS: Mean square

DFn: Degree of freedom from between the columns

DFd: Degree of freedom from within the columns

F: F-statistic
